# Supplementary material for: Diagnostic accuracy and predictors of alpha-synuclein accumulation in the gastrointestinal tract of Parkinson’s disease
Source: PubMed Central journal article supplement — NPJ Parkinsons Dis. 2024 Aug 15;10:155. doi: 10.1038/s41531-024-00766-3 (PMC11327357; doi:10.1038/s41531-024-00766-3), 2024-08-15
Supplement: 41531_2024_766_MOESM1_ESM.pdf [file 41531_2024_766_MOESM1_ESM.pdf]

# Supplementary Data

## Table of contents

Supplementary Figure 1. Selection process

Supplementary Figure 2. Additional images for each grade of AS accumulation of the neural structures within the submucosa and muscularis propria

Supplementary Table 1. Individual data and results

Supplementary Table 2. Clinical characteristics of patients and matched controls in UGI subgroup

Supplementary Table 3. Clinical characteristics of patients and matched controls in LGI subgroup

Supplementary Table 4. Differences of AS accumulation layer by layer in the intestinal wall between patients with PD and controls

Supplementary Table 5. Differences of AS accumulation layer by layer in the intestinal wall and location of marginal blocks

Supplementary Table 6. Differences of AS accumulation layer by layer in the intestinal wall and location of marginal blocks in UGI subgroup

Supplementary Table 7. Differences of AS accumulation layer by layer in the intestinal wall and location of marginal blocks in LGI subgroup

Supplementary Table 8. Differences of clinical characteristics between UGI and LGI subgroups in patients with PD and AS accumulation in the GI tract

Supplementary Table 9. Differences of clinical characteristics between controls with and without AS accumulation in the GI tract

Supplementary Table 10. Frequency of AS accumulation in the discretized subgroups of duration from symptom onset to surgery in patients with PD

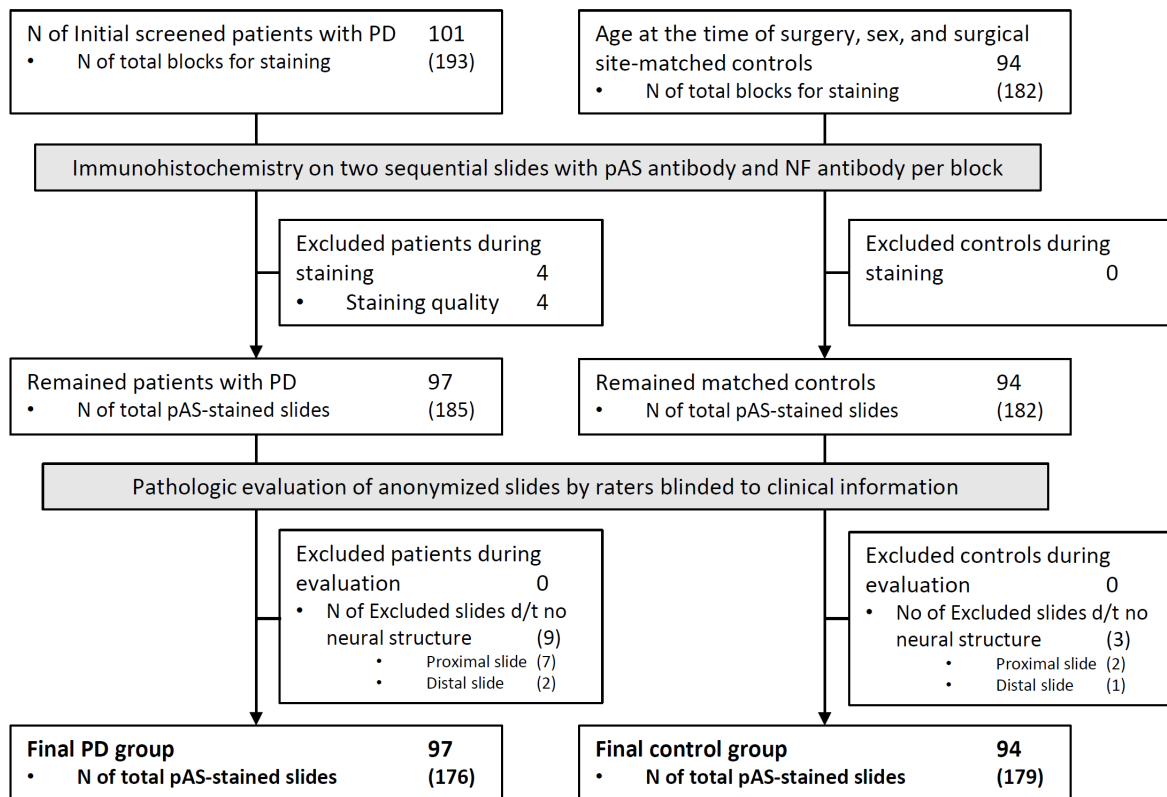

**Supplementary Figure 1. Selection process.** Abbreviations: N, number; PD, Parkinson’s disease; pAS, phosphorylated alpha-synuclein; NF, neurofilament.

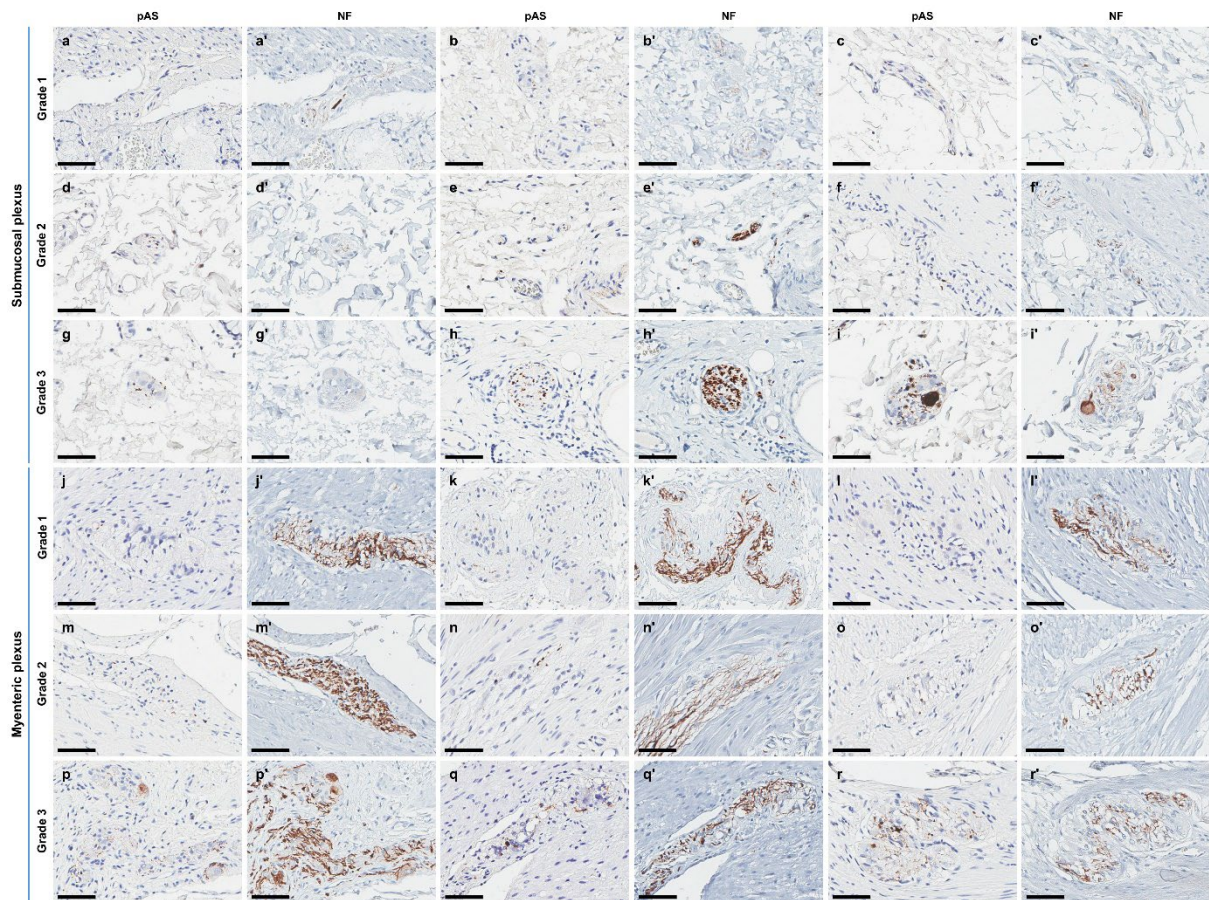

**Supplementary Figure 2. Additional images for each grade of AS accumulation of the neural structures within the submucosa and muscularis propria. a-r** All images were assigned the same grade by all raters: grade 0 (negative), grade 1 (sparse), grade 2 (moderate), and grade 3 (frequent). The dotted circle-shaped staining (p, lower right) represents one of the frequently observed staining patterns in the intestinal wall, potentially indicating pAS accumulation in neural processes adjacent to ganglion cells. **a'-r'** NF immunostaining in adjacent sections confirms the presence of neuronal cells. Scale bar: 60  $\mu$ m. Abbreviations: AS, alpha-synuclein; pAS, phosphorylated AS; NF, neurofilament.

# Supplementary Table 1. Individual data and results

| ID | Group<br>(1=PD,<br>0=Control) | Sex | Age at<br>symptom<br>onset (yrs) | Age at<br>diagnosis<br>(yrs) | Age at the<br>final<br>follow-up<br>visit (yrs) | Age at<br>surgery<br>(yrs) | Duration<br>from onset<br>to<br>diagnosis<br>(yrs) | Duration<br>from onset<br>to the final<br>follow-up<br>visit (yrs) | Duration<br>from onset<br>to surgery<br>(yrs) | Duration<br>from<br>surgery to<br>the final<br>follow-up<br>visit (yrs) | Clinical<br>diagnosis | HY stage | Surgery<br>category<br>(1=stomach,<br>2=colorectal,<br>3=esophagus,<br>4=others) | Surgery    | pAS result<br>final | distal pAS | distal pAS,<br>mucosa-<br>submucosa | distal pAS,<br>muscularis | distal pAS,<br>serosa | distal NF | proximal<br>pAS | proximal<br>pAS,<br>mucosa-<br>submucosa | proximal<br>pAS,<br>muscularis | proximal<br>pAS, serosa | proximal<br>NF |   |
|----|-------------------------------|-----|----------------------------------|------------------------------|-------------------------------------------------|----------------------------|----------------------------------------------------|--------------------------------------------------------------------|-----------------------------------------------|-------------------------------------------------------------------------|-----------------------|----------|----------------------------------------------------------------------------------|------------|---------------------|------------|-------------------------------------|---------------------------|-----------------------|-----------|-----------------|------------------------------------------|--------------------------------|-------------------------|----------------|---|
| 1  | 1                             | F   | 71                               | 74                           | 84                                              | 74                         | 3                                                  | 13                                                                 | 3                                             | 10                                                                      | PD                    |          | 1                                                                                | STG        | 1                   | X          | X                                   | X                         | X                     | X         |                 | 3                                        | 3                              | 3                       | 3              | 1 |
| 2  | 1                             | M   | 74                               | 77                           | 78                                              | 76                         | 3                                                  | 4                                                                  | 2                                             | 2                                                                       | PD                    |          | 1                                                                                | TG         | 1                   | 3          | 3                                   | 1                         | 0                     | 1         |                 | 3                                        | 0                              | 3                       |                | 1 |
| 3  | 1                             | M   | 73                               | 73                           | 83                                              | 74                         | 0                                                  | 10                                                                 | 1                                             | 9                                                                       | PD                    |          | 1                                                                                | DG         | 0                   | 0          | 0                                   | 0                         | 0                     | 1         |                 | 0                                        | 0                              | 0                       | 0              | 1 |
| 4  | 1                             | M   | 69                               | 70                           | 76                                              | 76                         | 1                                                  | 7                                                                  | 7                                             | 0                                                                       | PD                    |          | 1                                                                                | STG        | 1                   | 1          | 1                                   | 1                         | 0                     | 1         |                 | 2                                        | 1                              | 2                       |                | 1 |
| 5  | 1                             | M   | 71                               | 74                           | 81                                              | 76                         | 3                                                  | 10                                                                 | 5                                             | 5                                                                       | PD                    |          | 1                                                                                | DG         | 1                   | 3          | 3                                   | 2                         | 2                     | 1         |                 | 2                                        | 1                              | 2                       | 0              | 1 |
| 6  | 1                             | M   | 69                               | 69                           | 72                                              | 71                         | 0                                                  | 3                                                                  | 2                                             | 1                                                                       | PD                    |          | 1                                                                                | TG         | 1                   | X          | X                                   | X                         | X                     | X         |                 | 2                                        | 2                              | 2                       | 1              | 1 |
| 7  | 1                             | M   | 57                               | 59                           | 73                                              | 62                         | 2                                                  | 16                                                                 | 5                                             | 11                                                                      | PD                    |          | 1                                                                                | TG         | 1                   | 2          | 0                                   | 2                         | 0                     | 1         |                 | 3                                        | 0                              | 3                       | 0              | 1 |
| 8  | 1                             | M   | 57                               | 63                           | 75                                              | 68                         | 6                                                  | 18                                                                 | 11                                            | 7                                                                       | PD                    |          | 1                                                                                | DG         | 1                   | 2          | 1                                   | 2                         |                       | 1         |                 | 2                                        | 1                              | 2                       | 0              | 1 |
| 9  | 1                             | F   | 65                               | 67                           | 78                                              | 73                         | 2                                                  | 13                                                                 | 8                                             | 5                                                                       | PD                    |          | 1                                                                                | DG         | 1                   | 3          | 2                                   | 3                         | 0                     | 1         |                 |                                          |                                |                         |                | 0 |
| 10 | 1                             | M   | 64                               | 67                           | 78                                              | 75                         | 3                                                  | 14                                                                 | 11                                            | 3                                                                       | PD                    |          | 1                                                                                | TG         | 1                   | 3          | 3                                   | 2                         | 3                     | 1         |                 |                                          |                                |                         |                | 0 |
| 11 | 1                             | M   | 75                               | 75                           | 80                                              | 71                         | 0                                                  | 5                                                                  | -4                                            | 9                                                                       | PD                    |          | 2                                                                                | Miles      | 1                   |            |                                     |                           |                       | 0         |                 | 1                                        | 0                              | 1                       | 0              | 1 |
| 12 | 1                             | F   | 52                               | 53                           | 53                                              | 54                         | 1                                                  | 1                                                                  | 2                                             | -1                                                                      | PD                    |          | 2                                                                                | AR         | 0                   | 0          | 0                                   | 0                         | 0                     | 1         |                 | 0                                        | 0                              | 0                       | 0              | 1 |
| 13 | 1                             | F   | 66                               | 66                           | 73                                              | 69                         | 0                                                  | 7                                                                  | 3                                             | 4                                                                       | PD                    |          | 2                                                                                | RHC        | 0                   | 0          | 0                                   | 0                         | 0                     | 1         |                 | 0                                        | 0                              | 0                       |                | 1 |
| 14 | 1                             | M   | 70                               | 80                           | 84                                              | 72                         | 10                                                 | 14                                                                 | 2                                             | 12                                                                      | PD                    |          | 2                                                                                | AR         | 1                   | 2          | 0                                   | 2                         | 0                     | 1         |                 | 1                                        | 0                              | 1                       | 0              | 1 |
| 15 | 1                             | F   | 62                               | 63                           | 63                                              | 54                         | 1                                                  | 1                                                                  | -8                                            | 9                                                                       | PD                    |          | 2                                                                                | LAR        | 1                   | 0          | 0                                   | 0                         | 0                     | 1         |                 | 1                                        | 0                              | 1                       | 0              | 1 |
| 16 | 1                             | M   | 66                               | 69                           | 72                                              | 72                         | 3                                                  | 6                                                                  | 6                                             | 0                                                                       | PD                    |          | 2                                                                                | AR         | 1                   | 1          | 1                                   | 1                         | 1                     | 1         |                 | 0                                        | 0                              | 0                       | 0              | 1 |
| 17 | 1                             | F   | 61                               | 62                           | 72                                              | 67                         | 1                                                  | 11                                                                 | 6                                             | 5                                                                       | PD                    |          | 2                                                                                | AR         | 1                   | 2          | 1                                   | 2                         | 1                     | 1         |                 | 3                                        | 1                              | 3                       | 1              | 1 |
| 18 | 1                             | M   | 61                               | 62                           | 64                                              | 60                         | 1                                                  | 3                                                                  | -1                                            | 4                                                                       | PD                    |          | 2                                                                                | AR         | 0                   | 0          | 0                                   | 0                         | 0                     | 1         |                 | 0                                        | 0                              | 0                       | 0              | 1 |
| 19 | 1                             | F   | 71                               | 71                           | 79                                              | 65                         | 0                                                  | 8                                                                  | -6                                            | 14                                                                      | PD                    |          | 2                                                                                | LAR        | 0                   | 0          | 0                                   | 0                         | 0                     | 1         |                 | 0                                        | 0                              | 0                       | 0              | 1 |
| 20 | 1                             | F   | 59                               | 59                           | 70                                              | 62                         | 0                                                  | 11                                                                 | 3                                             | 8                                                                       | PD                    |          | 2                                                                                | RHC        | 1                   | 1          | 0                                   | 2                         | 0                     | 1         |                 | 3                                        | 0                              | 3                       |                | 1 |
| 21 | 1                             | F   | 69                               | 74                           | 78                                              | 75                         | 5                                                  | 9                                                                  | 6                                             | 3                                                                       | PD                    |          | 2                                                                                | LAR        | 1                   | 3          | 1                                   | 3                         | 1                     | 1         |                 | 3                                        | 0                              | 3                       | 2              | 1 |
| 22 | 1                             | M   | 72                               | 72                           | 80                                              | 76                         | 0                                                  | 8                                                                  | 4                                             | 4                                                                       | PD                    |          | 2                                                                                | RHC        | 0                   | 0          | 0                                   | 0                         |                       | 1         |                 | 0                                        | 0                              | 0                       |                | 1 |
| 23 | 1                             | M   | 57                               | 57                           | 70                                              | 67                         | 0                                                  | 13                                                                 | 10                                            | 3                                                                       | PD                    | 3        | 2                                                                                | RHC        | 1                   | 1          | 0                                   | 1                         | 0                     | 1         |                 | 0                                        | 0                              | 0                       | 0              | 1 |
| 24 | 1                             | M   | 72                               | 77                           | 81                                              | 81                         | 5                                                  | 9                                                                  | 9                                             | 0                                                                       | PD                    |          | 2                                                                                | AR         | 1                   | 1          | 0                                   | 1                         | 0                     | 1         |                 | 0                                        | 0                              | 0                       | 0              | 1 |
| 25 | 1                             | M   | 57                               | 57                           | 74                                              | 69                         | 0                                                  | 17                                                                 | 12                                            | 5                                                                       | PD                    |          | 2                                                                                | AR         | 1                   | 3          | 0                                   | 3                         | 1                     | 1         | X               | X                                        | X                              | X                       | X              |   |
| 26 | 1                             | F   | 58                               | 58                           | 75                                              | 67                         | 0                                                  | 17                                                                 | 9                                             | 8                                                                       | PD                    |          | 2                                                                                | LAR        | 0                   | 0          | 0                                   | 0                         | 0                     | 1         |                 | 0                                        | 0                              | 0                       | 0              | 1 |
| 27 | 1                             | M   | 78                               | 78                           | 87                                              | 87                         | 0                                                  | 9                                                                  | 9                                             | 0                                                                       | PD                    |          | 2                                                                                | RHC        | 1                   | 0          | 0                                   | 0                         | 0                     | 1         |                 | 1                                        | 0                              | 1                       |                | 1 |
| 28 | 1                             | F   | 65                               | 68                           | 70                                              | 68                         | 3                                                  | 5                                                                  | 3                                             | 2                                                                       | PD                    |          | 2                                                                                | ULAR       | 0                   | 0          | 0                                   |                           |                       | 1         |                 | 0                                        | 0                              | 0                       | 0              | 1 |
| 29 | 1                             | F   | 70                               | 71                           | 74                                              | 70                         | 1                                                  | 4                                                                  | 0                                             | 4                                                                       | PD                    | 3        | 2                                                                                | RHC        | 0                   | 0          | 0                                   | 0                         | 0                     | 1         |                 | 0                                        | 0                              | 0                       | 0              | 1 |
| 30 | 1                             | F   | 72                               | 73                           | 77                                              | 74                         | 1                                                  | 5                                                                  | 2                                             | 3                                                                       | PD                    | 2        | 2                                                                                | RHC        | 1                   | 2          | 1                                   | 2                         |                       | 1         |                 | 1                                        | 0                              | 1                       |                | 1 |
| 31 | 1                             | M   | 65                               | 65                           | 71                                              | 62                         | 0                                                  | 6                                                                  | -3                                            | 9                                                                       | PD                    |          | 2                                                                                | RHC        | 1                   | 3          | 2                                   | 3                         | 0                     | 1         |                 | 0                                        | 0                              | 0                       | 0              | 1 |
| 32 | 1                             | M   | 59                               | 66                           | 75                                              | 72                         | 7                                                  | 16                                                                 | 13                                            | 3                                                                       | PD                    | 2.5      | 1                                                                                | STG        | 1                   | X          | X                                   | X                         | X                     | X         |                 | 3                                        | 0                              | 3                       | 2              | 1 |
| 33 | 1                             | M   | 63                               | 66                           | 71                                              | 66                         | 3                                                  | 8                                                                  | 3                                             | 5                                                                       | PD                    | 2        | 1                                                                                | DG         | 1                   | 2          | 0                                   | 2                         | 0                     | 1         |                 | 0                                        | 0                              |                         |                | 1 |
| 34 | 1                             | M   | 57                               | 59                           | 68                                              | 66                         | 2                                                  | 11                                                                 | 9                                             | 2                                                                       | PD                    | 3        | 1                                                                                | DG         | 1                   | 2          | 2                                   | 1                         |                       | 1         |                 | 2                                        | 2                              | 1                       |                | 1 |
| 35 | 1                             | F   | 65                               | 66                           | 76                                              | 67                         | 1                                                  | 11                                                                 | 2                                             | 9                                                                       | PD                    |          | 1                                                                                | STG        | 1                   | 3          | 0                                   | 3                         |                       | 1         |                 | 3                                        | 1                              | 3                       |                | 1 |
| 36 | 1                             | F   | 64                               | 66                           | 81                                              | 73                         | 2                                                  | 17                                                                 | 9                                             | 8                                                                       | PD                    |          | 1                                                                                | STG        | 1                   | 3          | 2                                   | 3                         | 3                     | 1         |                 | 3                                        | 1                              | 3                       | 2              | 1 |
| 37 | 1                             | F   | 71                               | 71                           | 73                                              | 66                         | 0                                                  | 2                                                                  | -5                                            | 7                                                                       | PD                    |          | 1                                                                                | DG         | 0                   | 0          | 0                                   | 0                         | 0                     | 1         |                 | 0                                        | 0                              | 0                       | 0              | 1 |
| 38 | 1                             | M   | 63                               | 63                           | 64                                              | 63                         | 0                                                  | 1                                                                  | 0                                             | 1                                                                       | PD                    |          | 1                                                                                | STG        | 1                   | 2          | 0                                   | 2                         | 0                     | 1         | X               | X                                        | X                              | X                       | X              |   |
| 39 | 1                             | F   | 59                               | 59                           | 68                                              | 62                         | 0                                                  | 9                                                                  | 3                                             | 6                                                                       | PD                    | 1        | 1                                                                                | TG         | 1                   | 3          | 2                                   | 3                         |                       | 1         |                 | 3                                        | 3                              | 3                       | 1              | 1 |
| 40 | 1                             | M   | 60                               | 63                           | 65                                              | 63                         | 3                                                  | 5                                                                  | 3                                             | 2                                                                       | PD                    |          | 1                                                                                | Pancreatic | 1                   | 0          | 0                                   | 0                         | 0                     | 1         |                 | 2                                        | 0                              | 2                       | 0              | 1 |
| 41 | 1                             | F   | 52                               | 53                           | 61                                              | 59                         | 1                                                  | 9                                                                  | 7                                             | 2                                                                       | PD                    |          | 1                                                                                | TG         | 1                   |            |                                     |                           |                       | 0         |                 | 3                                        | 1                              | 3                       |                | 1 |
| 42 | 1                             | F   | 71                               | 73                           | 83                                              | 73                         | 2                                                  | 12                                                                 | 2                                             | 10                                                                      | PD                    |          | 1                                                                                | DG         | 1                   | 2          | 0                                   | 2                         |                       | 1         |                 | 1                                        | 1                              | 1                       |                | 1 |
| 43 | 1                             | M   | 52                               | 54                           | 66                                              | 65                         | 2                                                  | 14                                                                 | 13                                            | 1                                                                       | PD                    | 2.5      | 1                                                                                | DG         | 1                   | 1          | 1                                   |                           |                       | 1         |                 | 0                                        | 0                              |                         |                | 1 |
| 44 | 1                             | M   | 67                               | 68                           | 76                                              | 70                         | 1                                                  | 9                                                                  | 3                                             | 6                                                                       | PD                    | 1        | 1                                                                                | DG         | 1                   | 3          | 1                                   | 3                         | 2                     | 1         |                 | 3                                        | 0                              | 3                       | 2              | 1 |

|    |     |    |    |    |    |    |    |    |       |     |            |     |   |   |   |   |     |   |   |   |   |   |
|----|-----|----|----|----|----|----|----|----|-------|-----|------------|-----|---|---|---|---|-----|---|---|---|---|---|
| 45 | 1 F | 61 | 62 | 65 | 63 | 1  | 4  | 2  | 2 PD  | 1   | 1 DG       | 0   | 0 | 0 | 0 | 0 | 1   | 0 | 0 | 0 | 0 | 1 |
| 46 | 1 M | 56 | 59 | 62 | 60 | 3  | 6  | 4  | 2 PD  | 2.5 | 1 TG       | 0   | 0 | 0 | 0 | 0 | 1   | 0 | 0 | 0 | 0 | 1 |
| 47 | 1 F | 68 | 68 | 75 | 75 | 0  | 7  | 7  | 0 PD  | 3.5 | 1 PPPD     | 1 X | X | X | X | X | 2   | 0 | 2 | 0 | 1 |   |
| 48 | 1 F | 72 | 73 | 84 | 74 | 1  | 12 | 2  | 10 PD |     | 1 STG      | 1   | 3 | 2 | 3 | 1 | 1 X | X | X | X | X |   |
| 49 | 1 F | 70 | 71 | 84 | 78 | 1  | 14 | 8  | 6 PD  |     | 1 STG      | 1   | 1 | 0 | 1 | 0 | 1   | 2 | 2 | 1 | 1 | 1 |
| 50 | 1 F | 54 | 54 | 67 | 66 | 0  | 13 | 12 | 1 PD  |     | 1 DG       | 1   | 2 | 1 | 2 | 0 | 1   | 3 | 0 | 3 |   | 1 |
| 51 | 1 M | 78 | 81 | 82 | 76 | 3  | 4  | -2 | 6 PD  |     | 1 STG      | 1   | 1 | 0 | 1 | 0 | 1   | 3 | 0 | 3 | 0 | 1 |
| 52 | 1 F | 72 | 73 | 81 | 71 | 1  | 9  | -1 | 10 PD |     | 1 STG      | 1   | 2 | 2 | 2 | 1 | 1   | 2 | 1 | 2 | 0 | 1 |
| 53 | 1 F | 76 | 77 | 80 | 77 | 1  | 4  | 1  | 3 PD  |     | 2 RHC      | 1   | 2 | 0 | 2 | 0 | 1   | 1 | 0 | 1 | 0 | 1 |
| 54 | 1 F | 71 | 72 | 77 | 67 | 1  | 6  | -4 | 10 PD |     | 2 AR       | 1   | 1 | 0 | 1 | 0 | 1   | 1 | 0 | 1 | 0 | 1 |
| 55 | 1 F | 56 | 72 | 75 | 72 | 16 | 19 | 16 | 3 PD  |     | 2 AR       | 1   | 1 | 0 | 1 | 0 | 1   | 0 | 0 | 0 | 0 | 1 |
| 56 | 1 M | 59 | 60 | 71 | 62 | 1  | 12 | 3  | 9 PD  |     | 1 STG      | 1   | 2 | 2 | 2 | 0 | 1   | 2 | 1 | 2 | 0 | 1 |
| 57 | 1 M | 78 | 79 | 81 | 73 | 1  | 3  | -5 | 8 PD  |     | 1 DG       | 1   | 3 | 3 | 3 | 0 | 1   | 3 | 3 | 3 |   | 1 |
| 58 | 1 F | 70 | 70 | 80 | 77 | 0  | 10 | 7  | 3 PD  |     | 2 Hartmann | 1   | 3 | 3 | 3 | 1 | 1   | 3 | 3 | 3 | 2 | 1 |
| 59 | 1 M | 66 | 71 | 80 | 78 | 5  | 14 | 12 | 2 PD  |     | 1 DG       | 1   | 2 | 2 | 1 |   | 1   | 3 | 3 | 3 | 1 | 1 |
| 60 | 1 F | 85 | 86 | 93 | 85 | 1  | 8  | 0  | 8 PD  |     | 1 STG      | 0   | 0 | 0 | 0 |   | 1   | 0 | 0 | 0 | 0 | 1 |
| 61 | 1 M | 81 | 85 | 90 | 82 | 4  | 9  | 1  | 8 PD  |     | 1 STG      | 1   | 2 | 0 | 2 | 0 | 1   | 2 | 0 | 2 | 0 | 1 |
| 62 | 1 M | 66 | 67 | 77 | 66 | 1  | 11 | 0  | 11 PD |     | 2 ULAR     | 0   | 0 | 0 | 0 | 0 | 1 X | X | X | X | X |   |
| 63 | 1 M | 59 | 60 | 68 | 66 | 1  | 9  | 7  | 2 PD  |     | 1 TG       | 1   | 3 | 3 | 3 | 3 | 1   | 3 | 1 | 3 | 2 | 1 |
| 64 | 1 M | 71 | 73 | 81 | 72 | 2  | 10 | 1  | 9 PD  |     | 2 Miles    | 1   | 0 | 0 |   |   | 1   | 2 | 2 | 1 | 0 | 1 |
| 65 | 1 M | 63 | 66 | 78 | 74 | 3  | 15 | 11 | 4 PD  | 3   | 2 Hartmann | 1   | 1 | 0 | 1 | 1 | 1   | 1 | 0 | 1 | 1 | 1 |
| 66 | 1 F | 64 | 67 | 80 | 69 | 3  | 16 | 5  | 11 PD |     | 2 LAR      | 0   | 0 | 0 | 0 | 0 | 1 X | X | X | X | X |   |
| 67 | 1 M | 82 | 89 | 90 | 88 | 7  | 8  | 6  | 2 PD  |     | 2 Hartmann | 1   | 1 | 0 | 0 | 1 | 1   | 2 | 0 | 2 | 0 | 1 |
| 68 | 1 M | 58 | 65 | 74 | 68 | 7  | 16 | 10 | 6 PD  |     | 1 STG      | 1   | 2 | 0 | 2 |   | 1 X | X | X | X | X |   |
| 69 | 1 M | 69 | 69 | 79 | 82 | 0  | 10 | 13 | -3 PD |     | 2 AR       | 1   | 1 | 0 | 0 | 1 | 1   | 2 | 0 | 1 | 2 | 1 |
| 70 | 1 M | 72 | 73 | 73 | 73 | 1  | 1  | 1  | 0 PD  | 2   | 2 RHC      | 1   | 3 | 3 | 3 | 2 | 1   | 0 | 0 | 0 | 0 | 1 |
| 71 | 1 M | 74 | 74 | 75 | 70 | 0  | 1  | -4 | 5 PD  |     | 3 TG+Esoph | 1   | 1 | 0 | 1 | 0 | 1   |   |   |   |   |   |
| 72 | 1 M | 86 | 87 | 87 | 78 | 1  | 1  | -8 | 9 PD  |     | 1 STG      | 0   | 0 | 0 | 0 | 0 | 1   | 0 | 0 | 0 | 0 | 1 |
| 73 | 1 M | 73 | 74 | 76 | 74 | 1  | 3  | 1  | 2 PD  |     | 1 TG       | 1   | 3 | 1 | 3 | 2 | 1   | 3 | 0 | 3 | 0 | 1 |
| 74 | 1 F | 83 | 84 | 84 | 83 | 1  | 1  | 0  | 1 PD  |     | 2 RHC      | 1   | 2 | 0 | 2 | 0 | 1   | 0 | 0 | 0 | 0 | 1 |
| 75 | 1 M | 59 | 60 | 74 | 63 | 1  | 15 | 4  | 11 PD |     | 2 LAR      | 0   | 0 | 0 | 0 | 0 | 1   | 0 | 0 | 0 | 0 | 1 |
| 76 | 1 M | 67 | 68 | 77 | 73 | 1  | 10 | 6  | 4 PD  |     | 1 DG       | 1   | 2 | 2 | 1 |   | 1   | 0 |   |   | 0 | 1 |
| 77 | 1 F | 58 | 60 | 73 | 66 | 2  | 15 | 8  | 7 PD  |     | 2 LAR      | 0   | 0 | 0 |   |   | 1   | 0 | 0 | 0 | 0 | 1 |
| 78 | 1 F | 57 | 57 | 65 | 62 | 0  | 8  | 5  | 3 PD  |     | 2 RHC      | 1   | 1 | 0 | 1 | 0 | 1   | 0 | 0 | 0 | 0 | 1 |
| 79 | 1 F | 67 | 68 | 79 | 71 | 1  | 12 | 4  | 8 PD  |     | 1 DG       | 1   | 3 | 0 | 3 |   | 1   | 2 | 0 | 2 | 1 | 1 |
| 80 | 1 M | 68 | 70 | 76 | 70 | 2  | 8  | 2  | 6 PD  | 2.5 | 2 LAR      | 0   | 0 | 0 | 0 | 0 | 1   | 0 | 0 | 0 | 0 | 1 |
| 81 | 1 M | 71 | 72 | 78 | 72 | 1  | 7  | 1  | 6 PD  | 2   | 1 DG       | 1   | 3 | 2 | 3 |   | 1   | 3 | 2 | 3 | 0 | 1 |
| 82 | 1 F | 65 | 66 | 77 | 72 | 1  | 12 | 7  | 5 PD  | 2.5 | 1 DG       | 1   | 2 | 1 | 2 | 0 | 1   | 3 | 3 | 2 | 1 | 1 |
| 83 | 1 M | 78 | 79 | 81 | 79 | 1  | 3  | 1  | 2 PD  |     | 1 DG       | 0   | 0 | 0 | 0 |   | 1   |   |   |   |   | 0 |
| 84 | 1 M | 61 | 64 | 73 | 71 | 3  | 12 | 10 | 2 PD  | 1   | 2 AR       | 1   | 2 | 1 | 0 | 2 | 1   | 3 | 2 | 3 | 1 | 1 |
| 85 | 1 F | 64 | 65 | 78 | 69 | 1  | 14 | 5  | 9 PD  | 2.5 | 1 DG       | 1   | 3 | 1 | 3 | 0 | 1   | 3 | 3 | 3 | 2 | 1 |
| 86 | 1 F | 72 | 73 | 86 | 84 | 1  | 14 | 12 | 2 PD  | 3   | 2 AR       | 1   | 3 | 1 | 3 |   | 1   | 2 | 2 | 2 | 2 | 1 |
| 87 | 1 F | 68 | 69 | 80 | 73 | 1  | 12 | 5  | 7 PD  | 2   | 2 AR       | 0   | 0 | 0 | 0 | 0 | 1   | 0 | 0 | 0 | 0 | 1 |
| 88 | 1 F | 58 | 58 | 66 | 62 | 0  | 8  | 4  | 4 PD  | 3   | 1 DG       | 1   | 3 | 3 | 3 |   | 1   | 2 | 2 |   |   | 1 |
| 89 | 1 M | 64 | 65 | 75 | 71 | 1  | 11 | 7  | 4 PD  | 2.5 | 1 DG       | 1   | 3 | 2 | 3 | 1 | 1   | 2 | 0 | 2 | 1 | 1 |
| 90 | 1 M | 73 | 73 | 75 | 73 | 0  | 2  | 0  | 2 PD  | 2   | 2 AR       | 0   | 0 | 0 | 0 | 0 | 1   | 0 | 0 | 0 | 0 | 1 |
| 91 | 1 M | 79 | 82 | 82 | 82 | 3  | 3  | 3  | 0 PD  | 3   | 1 DG       | 1   | 3 | 3 | 3 | 0 | 1   |   |   |   |   | 0 |
| 92 | 1 M | 69 | 70 | 82 | 76 | 1  | 13 | 7  | 6 PD  | 2   | 1 DG       | 1   | 3 | 3 | 3 | 2 | 1   |   |   |   |   | 0 |
| 93 | 1 M | 64 | 65 | 71 | 68 | 1  | 7  | 4  | 3 PD  | 3   | 2 LAR      | 1   | 0 | 0 |   |   | 1   | 2 | 0 | 2 | 0 | 1 |

|     |   |   |    |    |    |    |   |    |   |    |    |     |   |            |   |   |   |   |   |   |   |   |   |   |   |   |  |
|-----|---|---|----|----|----|----|---|----|---|----|----|-----|---|------------|---|---|---|---|---|---|---|---|---|---|---|---|--|
| 94  | 1 | M | 73 | 74 | 77 | 76 | 1 | 4  | 3 | 1  | PD | 2.5 | 3 | Total esop | 1 | 3 | 3 | 2 | 2 | 1 | 0 | 0 |   |   |   | 1 |  |
| 95  | 1 | M | 69 | 70 | 80 | 77 | 1 | 11 | 8 | 3  | PD | 3   | 1 | DG         | 0 | 0 | 0 | 0 | 0 | 1 | 0 | 0 |   |   |   | 1 |  |
| 96  | 1 | M | 81 | 81 | 82 | 82 | 0 | 1  | 1 | 0  | PD |     | 1 | DG         | 0 | 0 | 0 | 0 | 0 | 1 | 0 | 0 | 0 | 0 |   | 1 |  |
| 97  | 1 | M | 51 | 52 | 62 | 60 | 1 | 11 | 9 | 2  | PD | 2.5 | 1 | DG         | 1 | 2 | 2 | 2 | 0 | 1 |   |   |   |   |   | 0 |  |
| 98  | 0 | M |    |    | 79 | 74 |   |    |   | 5  | NC |     | 1 | DG         | 0 | 0 | 0 | 0 | 0 | 1 | 0 | 0 | 0 | 0 |   | 1 |  |
| 99  | 0 | M |    |    | 83 | 76 |   |    |   | 7  | NC |     | 1 | DG         | 0 | 0 | 0 | 0 | 0 | 1 | 0 | 0 | 0 | 0 |   | 1 |  |
| 100 | 0 | F |    |    | 81 | 74 |   |    |   | 7  | NC |     | 1 | DG         | 0 | 0 | 0 | 0 | 0 | 1 | 0 | 0 | 0 | 0 |   | 1 |  |
| 101 | 0 | M |    |    | 82 | 76 |   |    |   | 6  | NC |     | 1 | DG         | 0 | 0 | 0 | 0 |   | 1 | 0 | 0 | 0 | 0 |   | 1 |  |
| 102 | 0 | M |    |    | 78 | 71 |   |    |   | 7  | NC |     | 1 | DG         | 0 | 0 | 0 | 0 | 0 | 1 | 0 | 0 | 0 | 0 |   | 1 |  |
| 103 | 0 | M |    |    | 69 | 62 |   |    |   | 7  | NC |     | 1 | DG         | 0 | 0 | 0 | 0 | 0 | 1 | 0 | 0 | 0 | 0 |   | 1 |  |
| 104 | 0 | F |    |    | 75 | 68 |   |    |   | 7  | NC |     | 1 | DG         | 0 | 0 | 0 | 0 | 0 | 1 | 0 | 0 | 0 | 0 |   | 1 |  |
| 105 | 0 | F |    |    | 81 | 73 |   |    |   | 8  | NC |     | 1 | DG         | 0 | 0 | 0 | 0 | 0 | 1 | 0 | 0 | 0 | 0 |   | 1 |  |
| 106 | 0 | M |    |    | 81 | 75 |   |    |   | 6  | NC |     | 1 | DG         | 0 | 0 | 0 | 0 | 0 | 1 | 0 | 0 | 0 | 0 |   | 1 |  |
| 107 | 0 | M |    |    | 82 | 71 |   |    |   | 11 | NC |     | 2 | LHC        | 0 | 0 | 0 | 0 | 0 | 1 | 0 | 0 | 0 | 0 |   | 1 |  |
| 108 | 0 | F |    |    | 61 | 54 |   |    |   | 7  | NC |     | 2 | LHC        | 0 | 0 | 0 | 0 | 0 | 1 | 0 | 0 | 0 | 0 |   | 1 |  |
| 109 | 0 | F |    |    | 75 | 69 |   |    |   | 6  | NC |     | 2 | LHC        | 0 | 0 | 0 | 0 | 0 | 1 | 0 | 0 | 0 | 0 |   | 1 |  |
| 110 | 0 | M |    |    | 81 | 72 |   |    |   | 9  | NC |     | 2 | RHC        | 0 | 0 | 0 | 0 | 0 | 1 | 0 | 0 | 0 | 0 |   | 1 |  |
| 111 | 0 | F |    |    | 61 | 54 |   |    |   | 7  | NC |     | 2 | RHC        | 0 | 0 | 0 | 0 | 0 | 1 | 0 | 0 | 0 | 0 |   | 1 |  |
| 112 | 0 | M |    |    | 77 | 72 |   |    |   | 5  | NC |     | 2 | RHC        | 0 | 0 | 0 | 0 | 0 | 1 | 0 | 0 | 0 | 0 |   | 1 |  |
| 113 | 0 | F |    |    | 77 | 67 |   |    |   | 10 | NC |     | 2 | RHC        | 0 | 0 | 0 | 0 | 0 | 1 | 0 | 0 | 0 | 0 |   | 1 |  |
| 114 | 0 | M |    |    | 66 | 60 |   |    |   | 6  | NC |     | 2 | RHC        | 0 | 0 | 0 | 0 | 0 | 1 | 0 | 0 | 0 | 0 |   | 1 |  |
| 115 | 0 | F |    |    | 73 | 65 |   |    |   | 8  | NC |     | 2 | RHC        | 0 | 0 | 0 | 0 | 0 | 1 | 0 | 0 | 0 | 0 |   | 1 |  |
| 116 | 0 | F |    |    | 70 | 62 |   |    |   | 8  | NC |     | 2 | RHC        | 0 |   |   |   |   | 0 | 0 | 0 | 0 | 0 |   | 1 |  |
| 117 | 0 | F |    |    | 82 | 75 |   |    |   | 7  | NC |     | 2 | RHC        | 0 | 0 | 0 | 0 | 0 | 1 | 0 | 0 | 0 | 0 |   | 1 |  |
| 118 | 0 | M |    |    | 83 | 76 |   |    |   | 7  | NC |     | 2 | RHC        | 0 | 0 | 0 | 0 | 0 | 1 | 0 | 0 | 0 | 0 |   | 1 |  |
| 119 | 0 | M |    |    | 75 | 67 |   |    |   | 8  | NC |     | 2 | RHC        | 0 | 0 | 0 | 0 | 0 | 1 | 0 | 0 | 0 | 0 |   | 1 |  |
| 120 | 0 | M |    |    | 90 | 81 |   |    |   | 9  | NC |     | 2 | RHC        | 0 | 0 | 0 | 0 | 0 | 1 | 0 | 0 | 0 | 0 |   | 1 |  |
| 121 | 0 | M |    |    | 76 | 69 |   |    |   | 7  | NC |     | 2 | RHC        | 0 | 0 | 0 | 0 | 0 | 1 | 0 | 0 | 0 | 0 |   | 1 |  |
| 122 | 0 | F |    |    | 72 | 67 |   |    |   | 5  | NC |     | 2 | RHC        | 0 | 0 | 0 | 0 | 0 | 1 | 0 | 0 | 0 | 0 |   | 1 |  |
| 123 | 0 | M |    |    | 89 | 87 |   |    |   | 2  | NC |     | 2 | RHC        | 0 | 0 | 0 | 0 |   | 1 | 0 | 0 | 0 | 0 |   | 1 |  |
| 124 | 0 | F |    |    | 76 | 68 |   |    |   | 8  | NC |     | 2 | RHC        | 0 | 0 | 0 | 0 | 0 | 1 | 0 | 0 | 0 | 0 |   | 1 |  |
| 125 | 0 | F |    |    | 80 | 70 |   |    |   | 10 | NC |     | 2 | RHC        | 0 | 0 | 0 | 0 |   | 1 | 0 | 0 | 0 | 0 |   | 1 |  |
| 126 | 0 | F |    |    | 79 | 74 |   |    |   | 5  | NC |     | 2 | RHC        | 0 | 0 | 0 | 0 | 0 | 1 | 0 | 0 | 0 | 0 |   | 1 |  |
| 127 | 0 | M |    |    | 77 | 72 |   |    |   | 5  | NC |     | 1 | PG         | 0 | 0 | 0 | 0 | 0 | 1 | 0 | 0 | 0 | 0 |   | 1 |  |
| 128 | 0 | M |    |    | 71 | 66 |   |    |   | 5  | NC |     | 1 | PG         | 0 | 0 | 0 | 0 | 0 | 1 | 0 | 0 | 0 | 0 |   | 1 |  |
| 129 | 0 | M |    |    | 73 | 66 |   |    |   | 7  | NC |     | 1 | STG        | 1 | 1 | 0 | 1 | 0 | 1 | 1 | 0 | 1 | 1 |   | 1 |  |
| 130 | 0 | F |    |    | 72 | 67 |   |    |   | 5  | NC |     | 1 | STG        | 0 | 0 | 0 | 0 | 0 | 1 | X | X | X | X | X |   |  |
| 131 | 0 | M |    |    | 80 | 73 |   |    |   | 7  | NC |     | 1 | STG        | 1 | 2 | 0 | 2 | 1 | 1 | 3 | 0 | 3 | 0 |   | 1 |  |
| 132 | 0 | M |    |    | 73 | 66 |   |    |   | 7  | NC |     | 1 | STG        | 0 | 0 | 0 | 0 | 0 | 1 | 0 | 0 | 0 | 0 |   | 1 |  |
| 133 | 0 | F |    |    | 69 | 63 |   |    |   | 6  | NC |     | 1 | STG        | 1 | 0 | 0 | 0 | 0 | 1 | 1 | 0 | 1 | 0 |   | 1 |  |
| 134 | 0 | M |    |    | 69 | 62 |   |    |   | 7  | NC |     | 1 | STG        | 0 | 0 | 0 | 0 | 0 | 1 | 0 | 0 | 0 | 0 |   | 1 |  |
| 135 | 0 | M |    |    | 68 | 63 |   |    |   | 5  | NC |     | 1 | STG        | 0 | 0 | 0 | 0 | 0 | 1 | 0 | 0 | 0 | 0 |   | 1 |  |
| 136 | 0 | M |    |    | 68 | 59 |   |    |   | 9  | NC |     | 1 | STG        | 0 | 0 | 0 | 0 | 0 | 1 | X | X | X | X | X |   |  |
| 137 | 0 | F |    |    | 81 | 73 |   |    |   | 8  | NC |     | 1 | STG        | 0 | 0 | 0 | 0 | 0 | 1 | 0 | 0 | 0 | 0 |   | 1 |  |
| 138 | 0 | M |    |    | 73 | 65 |   |    |   | 8  | NC |     | 1 | STG        | 0 | 0 | 0 | 0 | 0 | 1 | 0 | 0 | 0 | 0 |   | 1 |  |
| 139 | 0 | M |    |    | 76 | 70 |   |    |   | 6  | NC |     | 1 | STG        | 0 | 0 | 0 | 0 | 0 | 1 | 0 | 0 | 0 | 0 |   | 1 |  |
| 140 | 0 | M |    |    | 70 | 63 |   |    |   | 7  | NC |     | 1 | STG        | 0 | 0 | 0 | 0 | 0 | 1 | 0 | 0 | 0 | 0 |   | 1 |  |
| 141 | 0 | F |    |    | 67 | 60 |   |    |   | 7  | NC |     | 1 | STG        | 0 | 0 | 0 | 0 | 0 | 1 | 0 | 0 | 0 | 0 |   | 1 |  |
| 142 | 0 | M |    |    | 80 | 75 |   |    |   | 5  | NC |     | 1 | TG         | 0 | 0 | 0 | 0 | 0 | 1 | 0 | 0 | 0 | 0 |   | 1 |  |
| 143 | 0 | F |    |    | 80 | 74 |   |    |   | 6  | NC |     | 1 | TG         | 0 | 0 | 0 | 0 | 0 | 1 | 0 | 0 | 0 | 0 |   | 1 |  |
| 144 | 0 | M |    |    | 86 | 78 |   |    |   | 8  | NC |     | 1 | TG         | 0 | 0 | 0 | 0 | 0 | 1 | 0 | 0 | 0 | 0 |   | 1 |  |

|     |     |  |  |    |    |  |  |       |  |                |     |   |   |   |   |     |   |   |   |   |   |   |
|-----|-----|--|--|----|----|--|--|-------|--|----------------|-----|---|---|---|---|-----|---|---|---|---|---|---|
| 145 | 0 M |  |  | 71 | 66 |  |  | 5 NC  |  | 1 TG           | 0   | 0 | 0 | 0 | 0 | 1   | 0 | 0 | 0 | 0 | 0 | 1 |
| 146 | 0 M |  |  | 84 | 76 |  |  | 8 NC  |  | 1 STG          | 0   | 0 | 0 | 0 | 0 | 1   | 0 | 0 | 0 | 0 | 0 | 1 |
| 147 | 0 M |  |  | 78 | 71 |  |  | 7 NC  |  | 1 STG          | 0   | 0 | 0 | 0 | 0 | 1   | 0 | 0 | 0 | 0 | 0 | 1 |
| 148 | 0 F |  |  | 89 | 77 |  |  | 12 NC |  | 2 RHC          | 0   | 0 | 0 | 0 | 0 | 1   | 0 | 0 | 0 | 0 | 0 | 1 |
| 149 | 0 F |  |  | 77 | 67 |  |  | 10 NC |  | 2 RHC          | 0   | 0 | 0 | 0 | 0 | 1   | 0 | 0 | 0 | 0 | 0 | 1 |
| 150 | 0 F |  |  | 80 | 72 |  |  | 8 NC  |  | 2 RHC          | 0   | 0 | 0 | 0 | 0 | 1   | 0 | 0 | 0 | 0 | 0 | 1 |
| 151 | 0 M |  |  | 68 | 62 |  |  | 6 NC  |  | 1 TG           | 0   | 0 | 0 | 0 | 0 | 1   | 0 | 0 | 0 | 0 | 0 | 1 |
| 152 | 0 M |  |  | 78 | 73 |  |  | 5 NC  |  | 1 DG           | 0   | 0 | 0 | 0 | 0 | 1   | 0 | 0 | 0 | 0 | 0 | 1 |
| 153 | 0 F |  |  | 84 | 77 |  |  | 7 NC  |  | 2 RHC          | 0   | 0 | 0 | 0 | 0 | 1   | 0 | 0 | 0 | 0 | 0 | 1 |
| 154 | 0 M |  |  | 87 | 78 |  |  | 9 NC  |  | 1 STG          | 0   | 0 | 0 | 0 | 0 | 1 X | X | X | X | X | X |   |
| 155 | 0 M |  |  | 87 | 82 |  |  | 5 NC  |  | 1 DG           | 1   | 3 | 3 | 2 | 1 | 1   | 3 | 2 | 3 | 3 | 0 | 1 |
| 156 | 0 M |  |  | 78 | 66 |  |  | 12 NC |  | 2 LHC          | 0   | 0 | 0 | 0 | 0 | 1   | 0 | 0 | 0 | 0 | 0 | 1 |
| 157 | 0 M |  |  | 73 | 66 |  |  | 7 NC  |  | 1 DG           | 0   | 0 | 0 | 0 | 0 | 1   | 0 | 0 | 0 | 0 | 0 | 1 |
| 158 | 0 M |  |  | 85 | 72 |  |  | 13 NC |  | 2 RHC          | 0   | 0 | 0 | 0 | 0 | 1   |   |   |   |   |   | 0 |
| 159 | 0 M |  |  | 83 | 74 |  |  | 9 NC  |  | 2 RHC          | 0   | 0 | 0 | 0 | 0 | 1   | 0 | 0 | 0 | 0 | 0 | 1 |
| 160 | 0 F |  |  | 81 | 69 |  |  | 12 NC |  | 2 RHC          | 0   | 0 | 0 | 0 | 0 | 1   | 0 | 0 | 0 | 0 | 0 | 1 |
| 161 | 0 M |  |  | 97 | 88 |  |  | 9 NC  |  | 2 RHC          | 0   | 0 | 0 | 0 | 0 | 1   | 0 | 0 | 0 | 0 | 0 | 1 |
| 162 | 0 M |  |  | 79 | 68 |  |  | 11 NC |  | 1 STG          | 0   | 0 | 0 | 0 | 0 | 1   | 0 | 0 | 0 | 0 | 0 | 1 |
| 163 | 0 M |  |  | 90 | 82 |  |  | 8 NC  |  | 2 RHC          | 0   | 0 | 0 | 0 | 0 | 1   | 0 | 0 | 0 | 0 | 0 | 1 |
| 164 | 0 M |  |  | 85 | 73 |  |  | 12 NC |  | 2 RHC          | 0   | 0 | 0 | 0 | 0 | 1   | 0 | 0 | 0 | 0 | 0 | 1 |
| 165 | 0 M |  |  | 76 | 70 |  |  | 6 NC  |  | 1 STG          | 0   | 0 | 0 | 0 | 0 | 1   | 0 | 0 | 0 | 0 | 0 | 1 |
| 166 | 0 M |  |  | 91 | 78 |  |  | 13 NC |  | 1 STG          | 0   | 0 | 0 | 0 | 0 | 1   | 0 | 0 | 0 | 0 | 0 | 1 |
| 167 | 0 F |  |  | 86 | 74 |  |  | 12 NC |  | 1 STG          | 0   | 0 | 0 | 0 | 0 | 1 X | X | X | X | X | X |   |
| 168 | 0 F |  |  | 88 | 83 |  |  | 5 NC  |  | 2 total collec | 0   | 0 | 0 | 0 | 0 | 1   | 0 | 0 | 0 | 0 | 0 | 1 |
| 169 | 0 M |  |  | 70 | 63 |  |  | 7 NC  |  | 2 subtotal c   | 0   | 0 | 0 | 0 | 0 | 1   | 0 | 0 | 0 | 0 | 0 | 1 |
| 170 | 0 F |  |  | 82 | 73 |  |  | 9 NC  |  | 1 STG          | 0 X | X | X | X | X | X   | 0 | 0 | 0 | 0 | 0 | 1 |
| 171 | 0 F |  |  | 78 | 66 |  |  | 12 NC |  | 2 RHC          | 0   | 0 | 0 | 0 | 0 | 1   | 0 | 0 | 0 | 0 | 0 | 1 |
| 172 | 0 F |  |  | 72 | 62 |  |  | 10 NC |  | 2 LHC          | 0   | 0 | 0 | 0 | 0 | 1   | 0 | 0 | 0 | 0 | 0 | 1 |
| 173 | 0 M |  |  | 82 | 71 |  |  | 11 NC |  | 1 STG          | 0   | 0 | 0 | 0 | 0 | 1   | 0 | 0 | 0 | 0 | 0 | 1 |
| 174 | 0 M |  |  | 81 | 70 |  |  | 11 NC |  | 2 RHC          | 0   | 0 | 0 | 0 | 0 | 1   | 0 | 0 | 0 | 0 | 0 | 1 |
| 175 | 0 F |  |  | 82 | 72 |  |  | 10 NC |  | 1 DG           | 0   | 0 | 0 | 0 | 0 | 1   | 0 | 0 | 0 | 0 | 0 | 1 |
| 176 | 0 M |  |  | 79 | 72 |  |  | 7 NC  |  | 1 STG          | 1   | 2 | 2 | 2 | 2 | 1   | 2 | 1 | 2 | 1 | 1 | 1 |
| 177 | 0 M |  |  | 88 | 79 |  |  | 9 NC  |  | 1 STG          | 0   | 0 | 0 | 0 | 0 | 1   | 0 | 0 | 0 | 0 | 0 | 1 |
| 178 | 0 M |  |  | 81 | 71 |  |  | 10 NC |  | 2 RHC          | 0   | 0 | 0 | 0 | 0 | 1   | 0 | 0 | 0 | 0 | 0 | 1 |
| 179 | 0 M |  |  | 80 | 69 |  |  | 11 NC |  | 1 STG          | 0   | 0 | 0 | 0 | 0 | 1   | 0 | 0 | 0 | 0 | 0 | 1 |
| 180 | 0 F |  |  | 90 | 84 |  |  | 6 NC  |  | 2 RHC          | 0   | 0 | 0 | 0 | 0 | 1   | 0 | 0 | 0 | 0 | 0 | 1 |
| 181 | 0 F |  |  | 80 | 73 |  |  | 7 NC  |  | 2 RHC          | 0   | 0 | 0 | 0 | 0 | 1   |   |   |   |   |   | 0 |
| 182 | 0 M |  |  | 67 | 62 |  |  | 5 NC  |  | 1 DG           | 1   | 3 | 3 | 3 |   | 1   | 3 | 2 | 3 | 3 |   | 1 |
| 183 | 0 M |  |  | 76 | 71 |  |  | 5 NC  |  | 1 STG          | 0   | 0 | 0 | 0 | 0 | 1   | 0 | 0 | 0 | 0 | 0 | 1 |
| 184 | 0 M |  |  | 83 | 73 |  |  | 10 NC |  | 2 RHC          | 0   | 0 | 0 | 0 | 0 | 1   | 0 | 0 | 0 | 0 | 0 | 1 |
| 185 | 0 M |  |  | 87 | 82 |  |  | 5 NC  |  | 1 STG          | 0 X | X | X | X | X |     | 0 | 0 | 0 | 0 | 0 | 1 |
| 186 | 0 F |  |  | 85 | 76 |  |  | 9 NC  |  | 1 STG          | 0   | 0 | 0 | 0 | 0 | 1   | 0 | 0 | 0 | 0 | 0 | 1 |
| 187 | 0 M |  |  | 81 | 68 |  |  | 13 NC |  | 2 AR           | 0   | 0 | 0 | 0 | 0 | 1   | 0 | 0 | 0 | 0 | 0 | 1 |
| 188 | 0 M |  |  | 81 | 76 |  |  | 5 NC  |  | 1 TG           | 0   | 0 | 0 | 0 | 0 | 1   | 0 | 0 | 0 | 0 | 0 | 1 |
| 189 | 0 M |  |  | 82 | 77 |  |  | 5 NC  |  | 1 DG           | 1   | 3 | 3 | 3 | 3 | 1   | 3 | 3 | 3 | 3 | 0 | 1 |
| 190 | 0 M |  |  | 90 | 82 |  |  | 8 NC  |  | 1 STG          | 1   | 1 | 1 | 1 |   | 1   | 2 | 2 | 2 | 2 | 0 | 1 |
| 191 | 0 F |  |  | 65 | 60 |  |  | 5 NC  |  | 1 DG           | 0   | 0 | 0 | 0 | 0 | 1   | 0 | 0 | 0 | 0 | 0 | 1 |

**Supplementary Table 2. Clinical characteristics of patients and matched controls in UGI subgroup**

| <b>Characteristic</b>                                                         | <b>Patients with PD (N=55)</b> | <b>Controls (N=53)</b> | <b>p-value</b> |
|-------------------------------------------------------------------------------|--------------------------------|------------------------|----------------|
| Sex, No. (%)                                                                  |                                |                        |                |
| Male                                                                          | 36 (65.5)                      | 40 (75.5)              | 0.254          |
| Female                                                                        | 19 (34.5)                      | 13 (24.5)              |                |
| Age, mean (SD), y                                                             |                                |                        |                |
| At surgery                                                                    | 71.1 (6.3)                     | 70.8 (6.1)             | 0.767          |
| At the final follow-up visit                                                  | 75.9 (7.2)                     | 77.9 (6.7)             | 0.145          |
| At symptom onset                                                              | 66.9 (8.4)                     |                        |                |
| At diagnosis                                                                  | 68.6 (8.3)                     |                        |                |
| Duration, mean (SD), y                                                        |                                |                        |                |
| Onset to surgery                                                              | 4.2 (4.6)                      |                        |                |
| Onset to diagnosis                                                            | 1.7 (1.7)                      |                        |                |
| Onset to the final follow-up visit                                            | 9.0 (4.7)                      |                        |                |
| Surgery to the final follow-up visit                                          | 4.8 (3.2)                      | 7.1 (2.0)              | <0.001         |
| Frequency of patients who underwent surgery before the symptom onset, No. (%) | 6 (10.9)                       |                        |                |
| HY stage at the year of surgery (available in 18 patients, No. (%))           |                                |                        |                |
| 1                                                                             | 3 (5.5)                        |                        |                |
| 2                                                                             | 3 (5.5)                        |                        |                |
| 2.5                                                                           | 8 (14.5)                       |                        |                |
| 3                                                                             | 4 (7.3)                        |                        |                |
| Surgical site, No. (%)                                                        |                                |                        |                |
| Stomach                                                                       | 53 (96.4)                      | 53 (100)               | 0.496          |
| Esophagus                                                                     | 2 (3.6)                        | 0                      |                |

Abbreviations: UGI, upper gastrointestinal tract; PD, Parkinson's disease; HY, Hoehn and Yahr.



**Supplementary Table 3. Clinical characteristics of patients and matched controls in LGI subgroup**

| <b>Characteristic</b>                                                         | <b>Patients with PD (N=42)</b> | <b>Controls (N=41)</b> | <b>p-value</b> |
|-------------------------------------------------------------------------------|--------------------------------|------------------------|----------------|
| Sex, No. (%)                                                                  |                                |                        |                |
| Male                                                                          | 21 (50.0)                      | 20 (48.8)              | 0.912          |
| Female                                                                        | 21 (50.0)                      | 21 (51.2)              |                |
| Age, mean (SD), y                                                             |                                |                        |                |
| At surgery                                                                    | 70.8 (7.7)                     | 71.0 (7.6)             | 0.899          |
| At the final follow-up visit                                                  | 75.6 (6.8)                     | 79.5 (7.6)             | 0.016          |
| At symptom onset                                                              | 66.7 (7.2)                     |                        |                |
| At diagnosis                                                                  | 68.6 (7.7)                     |                        |                |
| Duration, mean (SD), y                                                        |                                |                        |                |
| Onset to surgery                                                              | 4.1 (5.3)                      |                        |                |
| Onset to surgery                                                              | 1.9 (3.0)                      |                        |                |
| Onset to diagnosis                                                            | 8.9 (4.8)                      |                        |                |
| Onset to the final follow-up visit                                            | 4.8 (4.0)                      | 8.5 (2.6)              | <0.001         |
| Frequency of patients who underwent surgery before the symptom onset, No. (%) | 6 (14.3)                       |                        |                |
| HY stage at the year of surgery (available in 11 patients), No. (%)           |                                |                        |                |
| 1                                                                             | 1 (2.4)                        |                        |                |
| 2                                                                             | 4 (9.5)                        |                        |                |
| 2.5                                                                           | 1 (2.4)                        |                        |                |
| 3                                                                             | 5 (11.9)                       |                        |                |
| Surgical site, No. (%)                                                        |                                |                        |                |
| <sup>1</sup> RLGI                                                             | 12 (28.6)                      | 33 (80.5)              | <0.001         |
| <sup>2</sup> LLGI                                                             | 30 (71.4)                      | 6 (14.6)               |                |
| <sup>3</sup> others                                                           | 0                              | 2 (4.9)                |                |

<sup>1</sup>RLGI includes surgical specimens acquired by right hemi-colectomy.

<sup>2</sup>LLGI includes surgical specimens acquired by anterior resection, lower anterior resection, ultra-lower anterior resection, Miles' operation, Hartmann's operation, or left hemi-colectomy.

<sup>3</sup>others include surgical specimens acquired by total colectomy and subtotal colectomy.

Abbreviations: LGI, lower gastrointestinal tract; PD, Parkinson's disease; GI, gastrointestinal; UGI, upper GI tract; LGI, lower GI tract; RLGI, right LGI; LLGI, left LGI.

**Supplementary Table 4. Differences of AS accumulation layer by layer in the intestinal wall between patients with PD and controls**

| Region                  | Layer              | Patients with PD |              | Controls  |              | p-value |
|-------------------------|--------------------|------------------|--------------|-----------|--------------|---------|
|                         |                    | Total No.        | AS+, No. (%) | Total No. | AS+, No. (%) |         |
| Entire GI tract         | Full layer         | 97               | 73 (75.3)    | 94        | 8 (8.5)      | <0.001  |
|                         | Mucosa / submucosa | 96               | 45 (46.9)    | 94        | 5 (5.3)      | <0.001  |
|                         | Muscularis         | 96               | 72 (75.0)    | 94        | 8 (8.5)      | <0.001  |
|                         | Serosa             | 87               | 31 (35.6)    | 92        | 6 (6.5)      | <0.001  |
| UGI (stomach+esophagus) | Full layer         | 55               | 46 (83.6)    | 53        | 8 (15.1)     | <0.001  |
|                         | Mucosa / submucosa | 54               | 35 (64.8)    | 53        | 5 (9.4)      | <0.001  |
|                         | Muscularis         | 54               | 45 (83.3)    | 53        | 8 (15.1)     | <0.001  |
|                         | Serosa             | 47               | 20 (42.6)    | 53        | 6 (11.3)     | <0.001  |
| LGI (colon+rectum)      | Full layer         | 42               | 27 (64.3)    | 41        | 0            | <0.001  |
|                         | Mucosa / submucosa | 42               | 10 (23.8)    | 41        | 0            | 0.001   |
|                         | Muscularis         | 42               | 27 (64.3)    | 41        | 0            | <0.001  |
|                         | Serosa             | 40               | 11 (27.5)    | 39        | 0            | <0.001  |

Abbreviations: PD, Parkinson's disease; AS, alpha-synuclein; GI, gastrointestinal; UGI, upper GI tract; LGI, lower GI tract.

**Supplementary Table 5. Differences of AS accumulation layer by layer in the intestinal wall and location of marginal blocks**

| Block                      | Layer              | PD Patients |            | Controls |          | p-value |
|----------------------------|--------------------|-------------|------------|----------|----------|---------|
|                            |                    | Total N     | AS+ (%)    | Total N  | AS+ (%)  |         |
| One or more in both blocks |                    |             |            |          |          |         |
|                            | Full layer         | 97          | 73 (75.3%) | 94       | 8 (8.5%) | <0.001  |
|                            | Mucosa / submucosa | 96          | 45 (46.9%) | 94       | 5 (5.3%) | <0.001  |
|                            | Muscularis         | 96          | 72 (75.0%) | 94       | 8 (8.5%) | <0.001  |
|                            | Serosa             | 87          | 31 (35.6%) | 92       | 6 (6.5%) | <0.001  |
| Proximal block only        |                    |             |            |          |          |         |
|                            | Full layer         | 84          | 51 (60.7%) | 88       | 8 (9.1%) | <0.001  |
|                            | Mucosa / submucosa | 83          | 26 (31.3%) | 88       | 5 (5.7%) | <0.001  |
|                            | Muscularis         | 78          | 50 (64.1%) | 88       | 8 (9.1%) | <0.001  |
|                            | Serosa             | 66          | 20 (30.3%) | 79       | 3 (3.8%) | <0.001  |
| Distal block only          |                    |             |            |          |          |         |
|                            | Full layer         | 91          | 62 (68.1%) | 91       | 7 (7.7%) | <0.001  |
|                            | Mucosa / submucosa | 91          | 38 (41.8%) | 91       | 5 (5.5%) | <0.001  |
|                            | Muscularis         | 86          | 58 (67.4%) | 91       | 7 (7.7%) | <0.001  |
|                            | Serosa             | 69          | 21 (30.4%) | 80       | 4 (5.0%) | <0.001  |

Abbreviations: PD, Parkinson's disease; AS, alpha-synuclein.

**Supplementary Table 6. Differences of AS accumulation layer by layer in the intestinal wall and location of marginal blocks in UGI subgroup**

| Block                      | Layer              | PD Patients |              | Controls  |              | p-value |
|----------------------------|--------------------|-------------|--------------|-----------|--------------|---------|
|                            |                    | Total No.   | AS+, No. (%) | Total No. | AS+, No. (%) |         |
| One or more in both blocks |                    |             |              |           |              |         |
|                            | Full layer         | 55          | 46 (83.6)    | 53        | 8 (15.1)     | <0.001  |
|                            | Mucosa / submucosa | 54          | 35 (64.8)    | 53        | 5 (9.4)      | <0.001  |
|                            | Muscularis         | 54          | 45 (83.3)    | 53        | 8 (15.1)     | <0.001  |
|                            | Serosa             | 47          | 20 (42.6)    | 53        | 6 (11.3)     | <0.001  |
| Proximal block only        |                    |             |              |           |              |         |
|                            | Full layer         | 45          | 33 (73.3)    | 49        | 8 (16.3)     | <0.001  |
|                            | Mucosa / submucosa | 44          | 21 (47.7)    | 49        | 5 (10.2)     | <0.001  |
|                            | Muscularis         | 39          | 32 (82.1)    | 49        | 8 (16.3)     | <0.001  |
|                            | Serosa             | 32          | 13 (40.6)    | 48        | 3 (6.3)      | <0.001  |
| Distal block only          |                    |             |              |           |              |         |
|                            | Full layer         | 50          | 40 (80.0)    | 51        | 7 (13.7)     | <0.001  |
|                            | Mucosa / submucosa | 50          | 29 (58.0)    | 51        | 5 (9.8)      | <0.001  |
|                            | Muscularis         | 49          | 39 (79.6)    | 51        | 7 (13.7)     | <0.001  |
|                            | Serosa             | 36          | 11 (30.6)    | 45        | 4 (8.9)      | 0.013   |

Abbreviations: AS, alpha-synuclein; UGI, upper gastrointestinal tract; PD, Parkinson's disease.

**Supplementary Table 7. Differences of AS accumulation layer by layer in the intestinal wall and location of marginal blocks in LGI subgroup**

| Block                      | Layer              | PD Patients |              | Controls  |              | p-value |
|----------------------------|--------------------|-------------|--------------|-----------|--------------|---------|
|                            |                    | Total No.   | AS+, No. (%) | Total No. | AS+, No. (%) |         |
| One or more in both blocks |                    |             |              |           |              |         |
|                            | Full layer         | 42          | 27 (64.3)    | 41        | 0            | <0.001  |
|                            | Mucosa / submucosa | 42          | 10 (23.8)    | 41        | 0            | 0.001   |
|                            | Muscularis         | 42          | 27 (64.3)    | 41        | 0            | <0.001  |
|                            | Serosa             | 40          | 11 (27.5)    | 39        | 0            | <0.001  |
| Proximal block only        |                    |             |              |           |              |         |
|                            | Full layer         | 39          | 18 (46.2)    | 39        | 0            | <0.001  |
|                            | Mucosa / submucosa | 39          | 5 (12.8)     | 39        | 0            | 0.055   |
|                            | Muscularis         | 39          | 18 (46.2)    | 39        | 0            | <0.001  |
|                            | Serosa             | 34          | 7 (20.6)     | 31        | 0            | 0.012   |
| Distal block only          |                    |             |              |           |              |         |
|                            | Full layer         | 41          | 22 (53.7)    | 40        | 0            | <0.001  |
|                            | Mucosa / submucosa | 41          | 9 (22.0)     | 40        | 0            | 0.002   |
|                            | Muscularis         | 37          | 19 (51.4)    | 40        | 0            | <0.001  |
|                            | Serosa             | 33          | 10 (30.3)    | 35        | 0            | <0.001  |

Abbreviations: AS, alpha-synuclein; LGI, lower gastrointestinal tract; PD, Parkinson's disease.

**Supplementary Table 8. Differences of clinical characteristics between UGI and LGI subgroups in patients with PD and AS accumulation in the GI tract**

| Characteristic                                                                | Patients with PD and AS+ |            | p-value |
|-------------------------------------------------------------------------------|--------------------------|------------|---------|
|                                                                               | UGI (N=46)               | LGI (N=27) |         |
| Sex, No. (%)                                                                  |                          |            |         |
| Male                                                                          | 30 (65.2)                | 15 (55.6)  | 0.412   |
| Female                                                                        | 16 (34.8)                | 12 (44.4)  |         |
| Age, mean (SD), y                                                             |                          |            |         |
| At surgery                                                                    | 70.6 (5.7)               | 72.7 (8.1) | 0.195   |
| At the final follow-up visit                                                  | 75.4 (6.5)               | 76.7 (6.6) | 0.426   |
| At symptom onset                                                              | 65.6 (7.5)               | 67.8 (7.6) | 0.243   |
| At diagnosis                                                                  | 67.5 (7.6)               | 70.1 (8.2) | 0.170   |
| Duration, mean (SD), y                                                        |                          |            |         |
| Onset to surgery                                                              | 5.0 (4.3)                | 4.9 (5.9)  | 0.980   |
| Onset to diagnosis                                                            | 1.8 (1.7)                | 2.3 (3.7)  | 0.521   |
| Onset to the final follow-up visit                                            | 9.8 (4.5)                | 8.9 (4.7)  | 0.427   |
| Surgery to the final follow-up visit                                          | 4.8 (3.2)                | 4.0 (3.7)  | 0.309   |
| Frequency of patients who underwent surgery before the symptom onset, No. (%) | 4 (8.7)                  | 4 (14.8)   | 0.457   |
| HY stage at the year of surgery (available in 22 patients), No. (%)           |                          |            |         |
| 1                                                                             | 2 (4.3)                  | 1 (3.7)    | 0.242   |
| 2                                                                             | 3 (6.5)                  | 2 (7.4)    |         |
| 2.5                                                                           | 7 (15.2)                 | 0          |         |
| 3                                                                             | 3 (6.5)                  | 4 (14.8)   |         |

Abbreviations: PD, Parkinson's disease; AS, alpha-synuclein; GI, gastrointestinal; UGI, upper GI tract; LGI, lower GI tract; HY, Hoehn and Yahr.

**Supplementary Table 9. Differences of clinical characteristics between controls with and without AS accumulation in the GI tract**

| Characteristic                                                   | Control    |            | p-value |
|------------------------------------------------------------------|------------|------------|---------|
|                                                                  | AS+ (N=8)  | AS- (N=86) |         |
| Sex, No. (%)                                                     |            |            |         |
| Male                                                             | 7 (87.5)   | 53 (61.6)  | 0.251   |
| Female                                                           | 1 (12.5)   | 35 (38.4)  |         |
| Age, mean (SD), y                                                |            |            |         |
| At surgery                                                       | 72.1 (8.0) | 70.7 (6.7) | 0.581   |
| At the final follow-up visit                                     | 78.4 (8.4) | 78.6 (7.0) | 0.951   |
| Duration from surgery to the final follow-up visit, mean (SD), y | 6.3 (1.2)  | 7.9 (2.4)  | 0.072   |
| Surgical site, No. (%)                                           |            |            |         |
| UGI                                                              | 8 (100)    | 45 (52.3)  | 0.009   |
| LGI                                                              | 0          | 41 (47.7)  |         |

Abbreviations: AS, alpha-synuclein; GI, gastrointestinal; UGI, upper GI tract; LGI, lower GI tract.

**Supplementary Table 10. Frequency of AS accumulation in the discretized subgroups of duration from symptom onset to surgery in patients with PD**

| Duration of onset to surgery (years) | N of patients with PD | Entire GI tract |              | <i>p</i> -value | UGI          |              | <i>p</i> -value | LGI          |              | <i>p</i> -value |
|--------------------------------------|-----------------------|-----------------|--------------|-----------------|--------------|--------------|-----------------|--------------|--------------|-----------------|
|                                      |                       | AS+, No. (%)    | AS-, No. (%) | 0.017           | AS+, No. (%) | AS-, No. (%) | 0.062           | AS+, No. (%) | AS-, No. (%) | 0.281           |
| before symptom onset                 | 12                    | 8 (66.7)        | 4 (33.3)     |                 | 4 (66.7)     | 2 (33.3)     |                 | 4 (66.7)     | 2 (33.3)     |                 |
| 0–5                                  | 48                    | 31 (64.6)       | 17 (35.4)    |                 | 22 (78.6)    | 6 (21.4)     |                 | 9 (45.0)     | 11 (55.0)    |                 |
| 6–10                                 | 26                    | 23 (88.5)       | 3 (11.5)     |                 | 14 (93.3)    | 1 (6.7)      |                 | 9 (81.8)     | 2 (18.2)     |                 |
| ≥11                                  | 11                    | 11 (100)        | 0            |                 | 6 (100)      | 0            |                 | 5 (100)      | 0            |                 |

Abbreviations: PD, Parkinson's disease; AS, alpha-synuclein; GI, gastrointestinal; UGI, upper GI tract; LGI, lower GI tract.
